# Supplementary material for: Fallopian tube rheology regulates epithelial cell differentiation and function to enhance cilia formation and coordination
Source: PubMed Central journal article supplement — Nat Commun. 2024 Aug 28;15:7411. doi: 10.1038/s41467-024-51481-9 (PMC11358425; doi:10.1038/s41467-024-51481-9), 2024-08-28
Supplement: 41467_2024_51481_MOESM3_ESM.pdf [file 41467_2024_51481_MOESM3_ESM.pdf]

## **Description of Additional Supplementary Files**

**Supplementary Movie 1** | Fallopian tube epithelial cells beating in 1 mPa·s, 50 mPa·s, 100 mPa·s, and 200 mPa·s culture media after 72 hours of culture. Videos were originally recorded at 200 frames per second, with a playback speed of 50 frames per second. Scale bars are 10  $\mu\text{m}$ .

**Supplementary Movie 2** | Fallopian tube epithelial cells cilia beating direction in 1 mPa·s and 200 mPa·s culture media. Videos were originally recorded at 200 frames per second, with a playback speed of 5 frames per second. Scale bars are 5  $\mu\text{m}$ .
